# Supplementary material for: Comparison of Pheochromocytoma-Specific Morbidity and Mortality Among Adults With Bilateral Pheochromocytomas Undergoing Total Adrenalectomy vs Cortical-Sparing Adrenalectomy
Source: PubMed Central journal article supplement (PMC6692838; doi:10.1001/jamanetworkopen.2019.8898), 2019-08-09
Supplement: jamanetwopen-2-e198898-s001.pdf [file jamanetwopen-2-e198898-s001.pdf]

## Supplementary Online Content

Neumann HPH, Tsoy U, Bancos I, et al; International Bilateral-Pheochromocytoma-Registry Group. Comparison of pheochromocytoma-specific morbidity and mortality among adults with bilateral pheochromocytomas undergoing total adrenalectomy vs cortical-sparing adrenalectomy. *JAMA Netw Open*. 2019;2(8):e198898.  
doi:10.1001/jamanetworkopen.2019.8898

**eTable 1.** Provenience of 625 Patients (377 Steroid Dependent and 248 Steroid Independent)

**eTable 2.** Germline Mutations in the Genes *RET*, *VHL*, *TMEM127*, *MAX*, *SDHD*, *SDHB* and *NF1*

This supplementary material has been provided by the authors to give readers additional information about their work.

**eTable 1** - Provenience of 625 patients (377 steroid dependent and 248 steroid independent). As pathogenic were called DNA variants as ACMG class 3 or less.

| Country               | All        | Steroid dependent | Steroid Independent |
|-----------------------|------------|-------------------|---------------------|
| Germany, n (%)        | 188 (30.1) | 20 (5.3)          | 163 (65.9)          |
| USA, n (%)            | 96 (15.4)  | 84 (22.3)         | 12 (4.9)            |
| China, n (%)          | 44 (7.1)   | 14 (3.8)          | 30 (12.3)           |
| Brazil, n (%)         | 41 (6.5)   | 40 (10.8)         | 1 (0.4)             |
| Italy, n (%)          | 39 (6.3)   | 21 (5.6)          | 18 (7.3)            |
| Netherlands, n (%)    | 30 (4.8)   | 30 (7.9)          | 0 (0)               |
| Russia, n (%)         | 34 (5.5)   | 31 (8.3)          | 3 (1.3)             |
| Poland, n (%)         | 29 (4.5)   | 24 (6.5)          | 5 (2.1)             |
| India, n (%)          | 27 (4.3)   | 19 (5.1)          | 8 (3.4)             |
| France, n (%)         | 18 (2.9)   | 16 (4.3)          | 2 (0.8)             |
| Czech republic, n (%) | 17 (2.7)   | 16 (4.3)          | 1 (0.4)             |
| Ukraine, n (%)        | 13 (2.1)   | 12 (3.2)          | 1 (0.4)             |
| Spain, n (%)          | 10 (1.6)   | 10 (2.7)          | 0 (0)               |
| Israel, n (%)         | 9 (1.5)    | 9 (2.5)           | 0 (0)               |
| Chile, n (%)          | 7 (1.1)    | 7 (1.9)           | 0 (0)               |
| Sweden, n (%)         | 7 (1.1)    | 6 (1.6)           | 1 (0.4)             |
| Thailand, n (%)       | 5 (0.8)    | 5 (1.3)           | 0 (0)               |
| Turkey, n (%)         | 5 (0.8)    | 5 (1.3)           | 0 (0)               |
| Slovenia, n (%)       | 3 (0.4)    | 2 (0.5)           | 1 (0.4)             |
| Finland, n(%)         | 2 (0.3)    | 2 (0.5)           | 0 (0)               |
| Singapore, n (%)      | 1 (0.2)    | 1 (0.3)           | 0 (0)               |

**eTable 2** Germline mutations in the genes *RET*, *VHL*, *TMEM127*, *MAX*, *SDHD*, *SDHB* and *NF1*

| Amino acid change | Nucleotide change   | ACMG Variant Class* | Number of Variant Carriers |
|-------------------|---------------------|---------------------|----------------------------|
| <b><u>RET</u></b> |                     |                     |                            |
| p.Cys609Phe       | c.1826G>T           | 5                   | 1                          |
| p. Cys611Trp      | c.1833C>G           | 4                   | 2                          |
| p.Cys618Arg       | c.1852T>C           | 5                   | 3                          |
| p.Cys618Ser       | c.1852T>A           | 5                   | 3                          |
| p.Cys618Tyr       | c.1853G>A           | 5                   | 2                          |
| p.Cys620Arg       | c.1858T>C           | 5                   | 1                          |
| p.Cys620Gly       | c.1858T>G           | 5                   | 1                          |
| p.Asp631Tyr       | c.1891G>T           | 5                   | 1                          |
| p.Cys634Arg       | c.1900T>C           | 5                   | 89                         |
| p.Cys634Gly       | c.1900T>G           | 5                   | 27                         |
| p.Cys634Phe       | c.1901G>T           | 5                   | 6                          |
| p.Cys634Ser       | c.1901G>C/c.1900T>A | 5                   | 12                         |
| p.Cys634Trp       | c.1902C>G           | 5                   | 11                         |
| p.Cys634Tyr       | c.1901G>A           | 5                   | 75                         |
| p.Val804Leu       | c.2410G>C           | 5                   | 1                          |
| p.Val804Met       | c.2410G>A           | 5                   | 1                          |
| p.Met918Thr       | c.2753T>C           | 5                   | 46                         |
|                   |                     |                     |                            |
| <b><u>VHL</u></b> |                     |                     |                            |
| p.Leu63Arg        | c.188T>G            | 4                   | 1                          |
| p.Arg64Pro        | c.191G>C            | 4                   | 1                          |
| p.Ser65Pro        | c.193T>C            | 4                   | 1                          |
| p.Ser65Thr        | c.193T>A            | 4                   | 1                          |
| p.Ser68Trp        | c.203C>G            | 4                   | 1                          |
| p.Ser80Gly        | c.238A>G            | 4                   | 1                          |

|             |          |   |    |
|-------------|----------|---|----|
| p.Pro86Ala  | c.256C>G | 5 | 1  |
| p.Pro86Thr  | c.256C>A | 4 | 1  |
| p.Pro86Leu  | c.257C>T | 5 | 1  |
| p.Gly93Arg  | c.277G>C | 4 | 5  |
| p.Gly93Cys  | c.277G>T | 4 | 4  |
| p.Gly93Ser  | c.277G>A | 4 | 3  |
| p.Tyr98His  | c.292T>C | 5 | 25 |
| p.Tyr98Cys  | c.293A>G | 4 | 1  |
| p.Tyr98Ser  | c.293A>C | 4 | 2  |
| p.Arg107Gly | c.319C>G | 4 | 1  |
| p.Arg107His | c.320G>A | 4 | 2  |
| p.Gly114Ser | c.340G>A | 5 | 1  |
| p.Leu116Pro | c.347T>C | 4 | 1  |
| p.Leu118Arg | c.353T>G | 4 | 1  |
| p.Phe119Leu | c.355T>C | 5 | 2  |
| p.Asp121Gly | c.362A>G | 4 | 1  |
| p.Thr124Ile | c.371C>T | 4 | 4  |
| p.His125Pro | c.374A>C | 4 | 1  |
| p.Thr157Ile | c.470C>T | 4 | 1  |
| p.Leu135*   | c.404T>A | 5 | 3  |
| p.Phe136Cys | c.407T>G | 4 | 1  |
| p.Ile151Met | c.453C>G | 4 | 1  |
| p.Tyr156Cys | c.467A>G | 4 | 6  |
| p.Arg161*   | c.481C>T | 5 | 1  |
| p.Arg161Gln | c.482G>A | 5 | 21 |
| p.Arg161Pro | c.482G>C | 4 | 2  |
| p.Gln164Arg | c.491A>G | 4 | 3  |
| p.Val166Ala | c.497T>C | 4 | 1  |
| p.Arg167Trp | c.499C>T | 5 | 31 |

|                       |                 |   |    |
|-----------------------|-----------------|---|----|
| p.Arg167Gln           | c.500G>A        | 5 | 36 |
| p.Val170Gly           | c.509T>G        | 4 | 2  |
| p.Leu178Gln           | c.533T>A        | 4 | 1  |
| p.Leu188Val           | c.562C>G        | 5 | 1  |
| p.Pro192Leu           | c.575C>T        | 4 | 2  |
| p.Gln195*             | c.583C>T        | 5 | 2  |
| p.Leu198Pro           | c.593T>C        | 4 | 3  |
| p.Leu198Gln           | c.593T>A        | 4 | 1  |
| p.*214Glyext14        | c.640T>G        | 4 | 2  |
|                       |                 |   |    |
| <b><u>TMEM127</u></b> |                 |   |    |
| p.Ser40Phe            | c.119C>T        | 4 | 1  |
| p.?                   | c.410-2A>G      | 5 | 1  |
| p.Ser167Profs*10      | c.498_499ins350 | 4 | 1  |
| p.Phe173Ser           | c.518T>C        | 4 | 1  |
| p.Gly185Arg           | c.553G>A        | 4 | 1  |
|                       |                 |   |    |
| <b><u>MAX</u></b>     |                 |   |    |
| p.Ser52*              | c.155C>A        | 4 | 1  |
| p.Gln54Lysfs*11       | c.160delC       | 4 | 1  |
| p.?                   | c.171+G>A       | 5 | 1  |
| p.Arg66*              | c.196C>T        | 5 | 1  |
| p.Arg75*              | c.223C>T        | 5 | 2  |
| p.His81Profs*5        | c.242_243delAC  | 4 | 1  |
| p.Gln98Profs*48       | c.292dupC       | 4 | 1  |
| p.Glu103*             | c.307G>T        | 4 | 1  |
|                       |                 |   |    |
| <b><u>NF1</u></b>     |                 |   |    |
| p.Thr165Leufs*13      |                 | 4 | 1  |

|                    |                |   |   |
|--------------------|----------------|---|---|
| p.Tyr489Cys        | c.1466A>G      | 5 | 1 |
| p.Gly822*          | c.2646G>T      | 5 | 3 |
| p.Leu1153Metfs*4   | c.3457_3460del | 5 | 1 |
| p.Arg1276*         | c.3826C>T      | 5 | 1 |
|                    |                |   |   |
| <b><u>SDHD</u></b> |                |   |   |
| p.Trp5*            | c.14G>A        | 5 | 3 |
| p.Ala13Profs*55    | c.36_37delTG   | 5 | 1 |
| p.?                | c.52+1G>T      | 5 | 1 |
| p.Gln121*          | c.361C>T       | 5 | 1 |
| Large Deletion     |                | 5 | 1 |
|                    |                |   |   |
| <b><u>SDHB</u></b> |                |   |   |
| Large Deletion     |                | 5 | 1 |

\*ACMG class 4 (likely pathogenic) or 5 (pathogenic) are considered as mutation positive for purposes of this analysis
